# Supplementary material for: Amorphous versus nanocrystalline RuO2 electrocatalysts: activity and stability for oxygen evolution reaction in sulfuric acid
Source: Royal Society of Chemistry journal article supplement (doi:10.1039/d3cy01144e), 2023-01-01
Supplement: d3cy01144e1.pdf [file d3cy01144e1.pdf]

## Supporting Information

### **Amorphous versus nanocrystalline RuO<sub>2</sub> electrocatalysts: Activity and stability for oxygen evolution reaction in sulfuric acid**

Kosuke Beppu,<sup>a</sup> Kazuki Obigane,<sup>a</sup> and Fumiaki Amano <sup>\*a</sup>

*<sup>a</sup>Department of Applied Chemistry for Environment, Graduate School of Urban Environmental Sciences, Tokyo Metropolitan University, 1-1 Minami-Osawa, Hachioji, Tokyo 192-0397, Japan.*

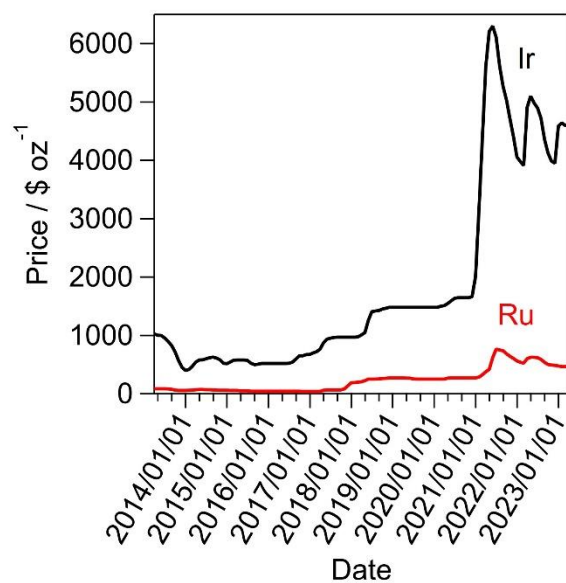

Figure S1 Ir and Ru price changes over the past 10 years. The data were obtained from <http://www.platinum.matthey.com/prices/price-charts>.

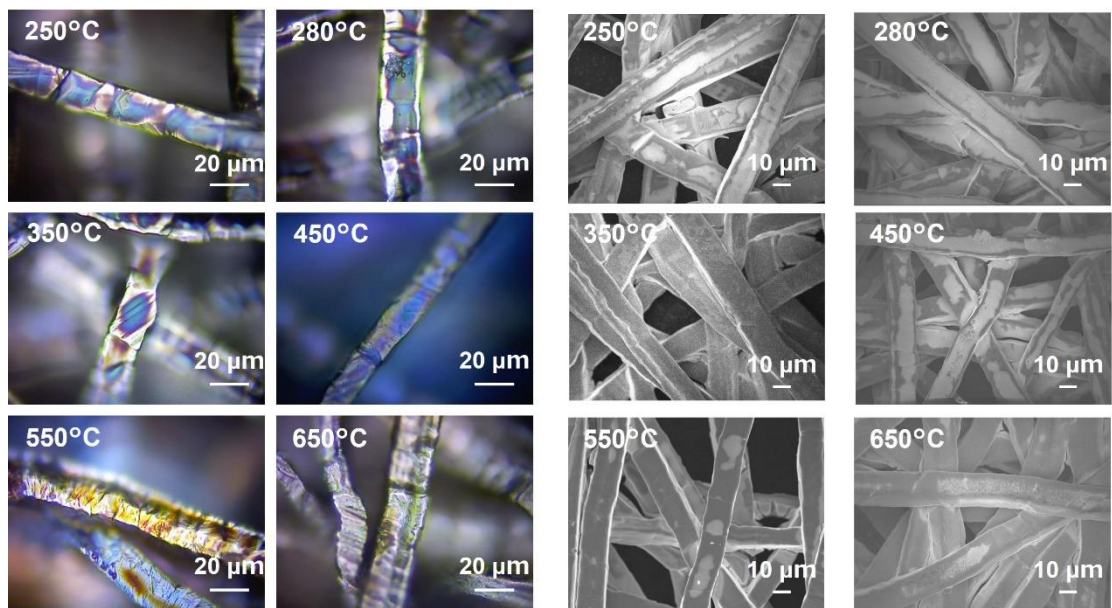

Figure S2 Optical micrographs (left) and low magnification SEM images (right) of RuO<sub>2</sub>/Ti-felt(x) samples.

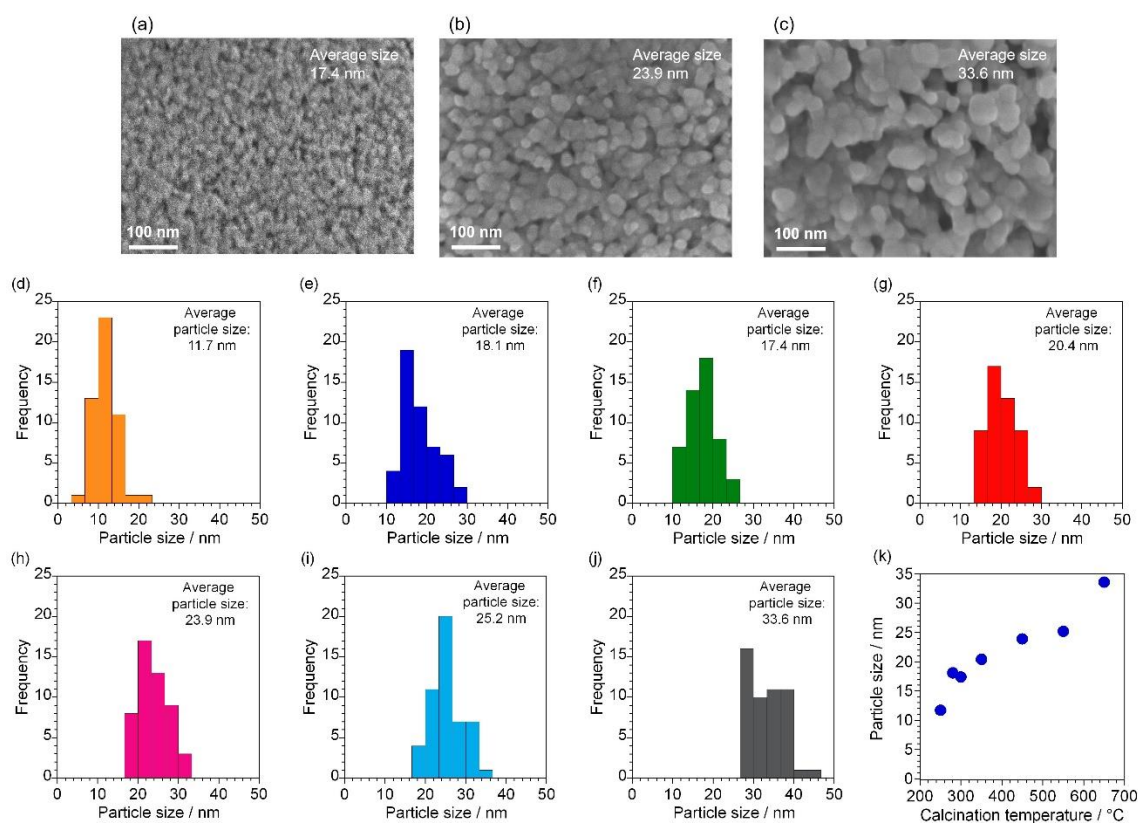

Figure S3 Surface SEM images of (a) RuO<sub>2</sub>/Ti-felt(300), (b) RuO<sub>2</sub>/Ti-felt(450) and (c) RuO<sub>2</sub>/Ti-felt(650) electrocatalysts. (d–j) Particle size distributions of RuO<sub>2</sub> in RuO<sub>2</sub>/Ti-felt(x) samples estimated from SEM images; (d) RuO<sub>2</sub>/Ti-felt(250), (e) RuO<sub>2</sub>/Ti-felt(280), (f) RuO<sub>2</sub>/Ti-felt(300), (g) RuO<sub>2</sub>/Ti-felt(350), (h) RuO<sub>2</sub>/Ti-felt(450), (i) RuO<sub>2</sub>/Ti-felt(550) and (j) RuO<sub>2</sub>/Ti-felt(650). (k) Average particle size in RuO<sub>2</sub>/Ti-felt(x) samples as a function of calcination temperature.

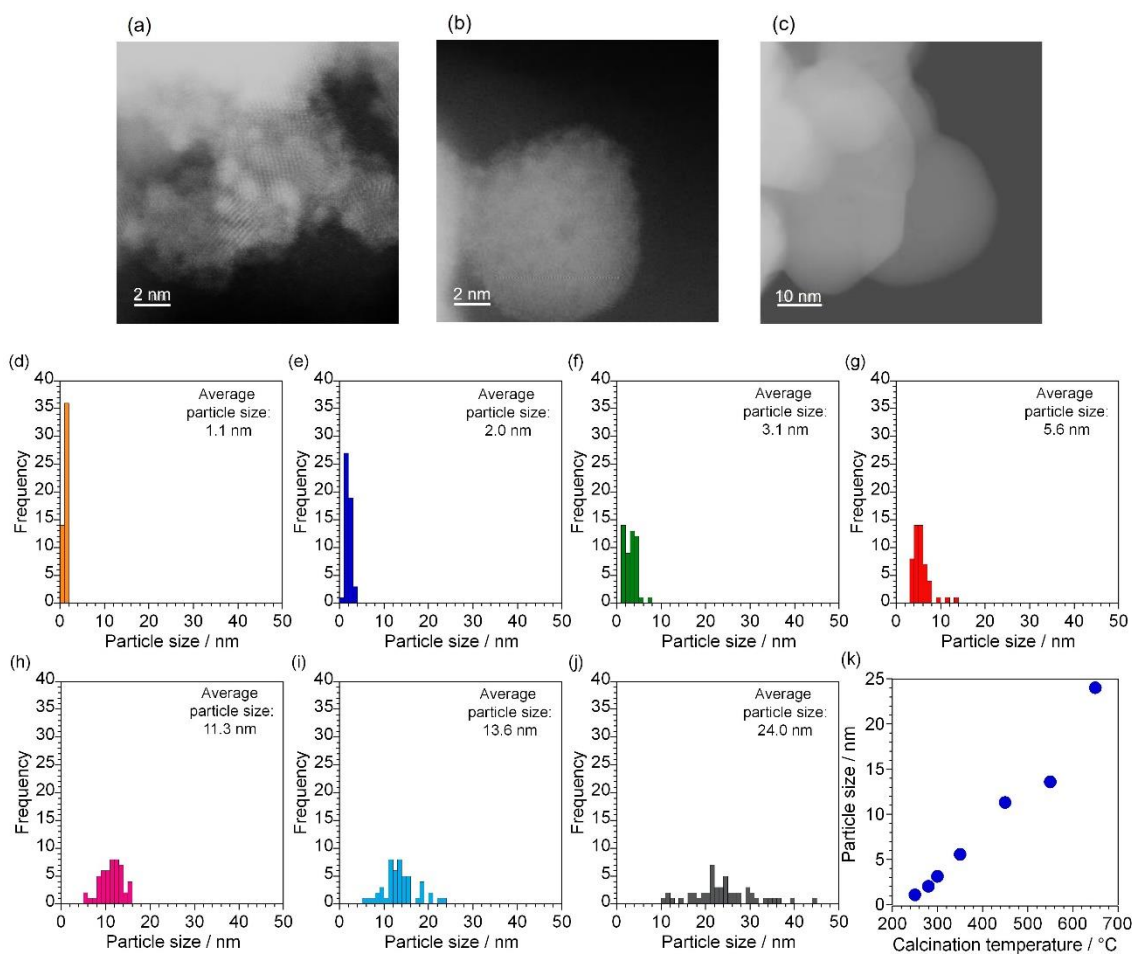

Figure S4 STEM images of (a) RuO<sub>2</sub>/Ti-felt(300), (b) RuO<sub>2</sub>/Ti-felt(450) and (c) RuO<sub>2</sub>/Ti-felt(650) electrocatalysts. (d–j) Particle size distributions of RuO<sub>2</sub> in RuO<sub>2</sub>/Ti-felt(x) estimated from STEM images; (d) RuO<sub>2</sub>/Ti-felt(250), (e) RuO<sub>2</sub>/Ti-felt(280), (f) RuO<sub>2</sub>/Ti-felt(300), (g) RuO<sub>2</sub>/Ti-felt(350), (h) RuO<sub>2</sub>/Ti-felt(450), (i) RuO<sub>2</sub>/Ti-felt(550) and (j) RuO<sub>2</sub>/Ti-felt(650). (k) Average particle size in RuO<sub>2</sub>/Ti-felt(x) samples as a function of calcination temperature.

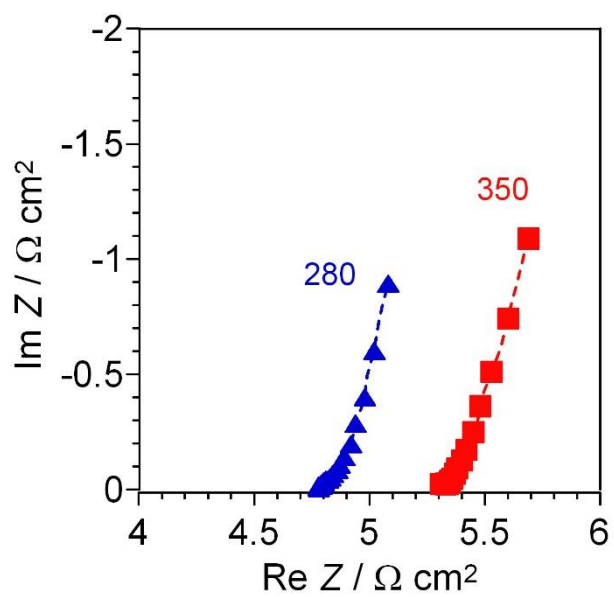

Figure S5 EIS spectra of RuO<sub>2</sub>/Ti-felt(280) and RuO<sub>2</sub>/Ti-felt(350) electrocatalysts. Data were obtained at 0.26 V vs. RHE from 10 to 10000 Hz.

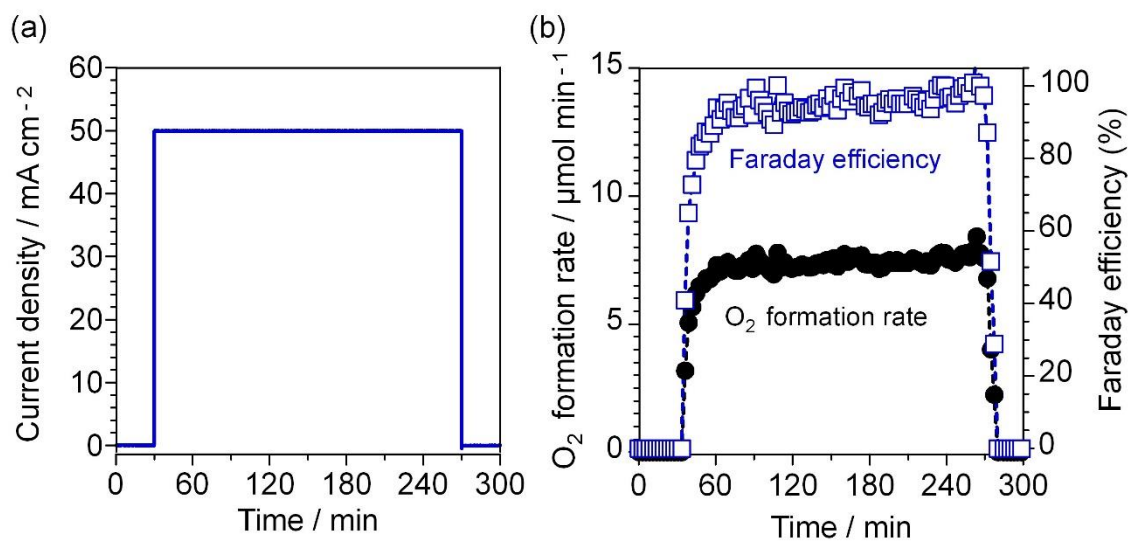

Figure S6 (a) Time course of current density for O<sub>2</sub> gas detection for 4 h. (b) The rate of O<sub>2</sub> gas evolution and Faraday efficiency of O<sub>2</sub> production. The current density was set at zero for 30 min before and 30 min after a 4 h CP experiment at 50 mA cm<sup>-2</sup>.

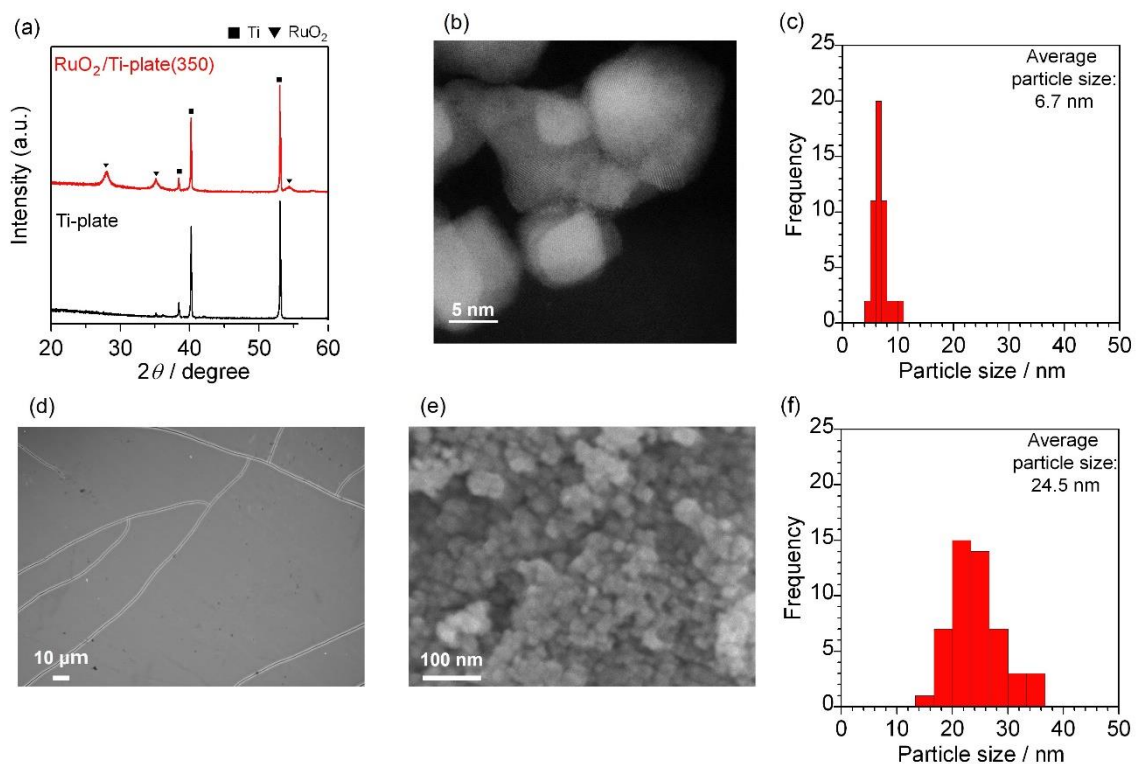

Figure S7 Characterisation of the RuO<sub>2</sub>/Ti-plate(350) electrocatalyst. (a) XRD patterns. (b) STEM image. (c) Particle size distribution of RuO<sub>2</sub>/Ti-plate(350) estimated by STEM. (d) Low and (e) high magnification SEM images. (f) Particle size distribution of RuO<sub>2</sub>/Ti-plate(350) estimated by SEM.



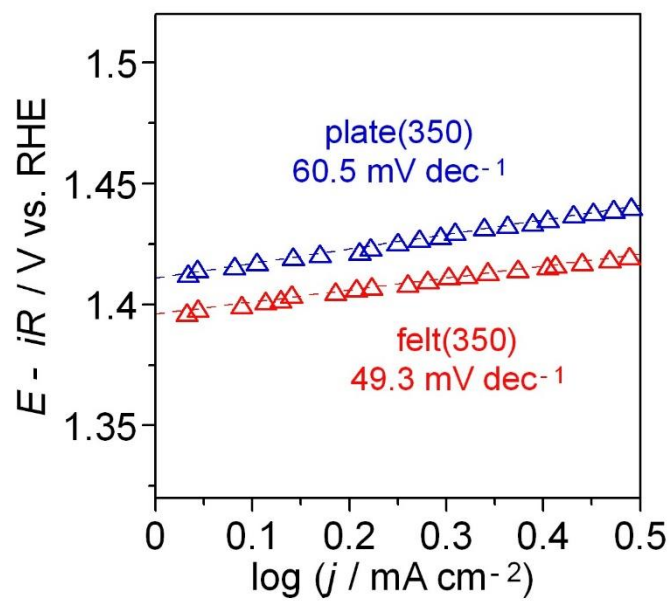

Figure S8 Tafel plots and slopes of  $iR$ -corrected OER activities of  $\text{RuO}_2/\text{Ti-felt}(350)$  and  $\text{RuO}_2/\text{Ti-plate}(350)$  electrocatalysts. Dashed lines are the fitting results.

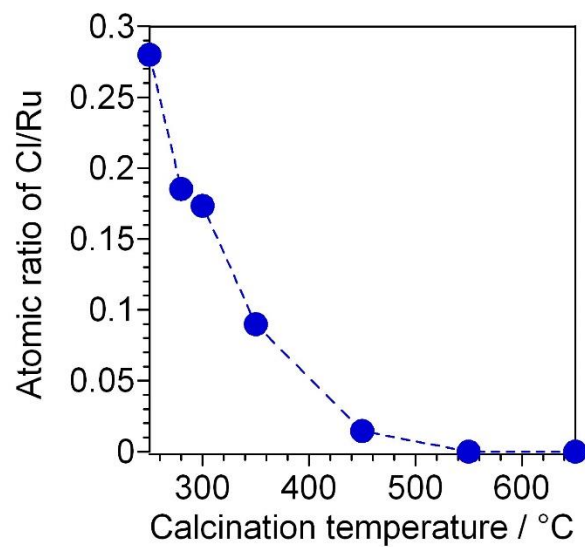

Figure S9 Effect of calcination temperature on the surface Cl/Ru ratio obtained from XPS spectra.

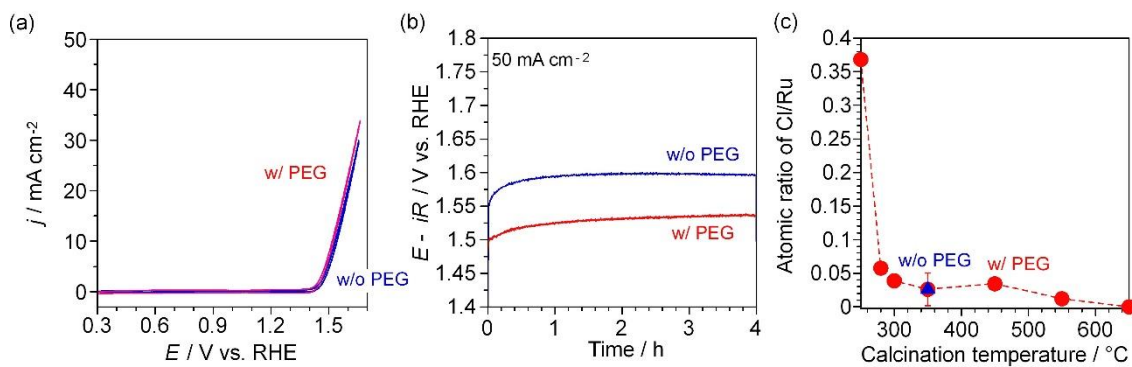

Figure S10 Comparative OER performance of RuO<sub>2</sub>/Ti-felt(350) electrocatalyst using the precursor with (red) and without (blue) PEG. (a) CV at 10 mV s<sup>-1</sup>. (b) Chronopotentiometry at 50 mA cm<sup>-2</sup>. (c) Atomic ratio of Cl/Ru obtained from XRF spectra.

Table S1 Comparison of OER activity with that of previously reported electrocatalysts.

| Samples                                       | $\eta$ at 10 mA<br>cm <sup>-2</sup> [mV] | Tafel slope<br>[mV dec <sup>-1</sup> ] | O <sub>2</sub> Faraday<br>efficiency | Electrolyte                             | Reference    |
|-----------------------------------------------|------------------------------------------|----------------------------------------|--------------------------------------|-----------------------------------------|--------------|
| RuO <sub>2</sub> /<br>Ti felt(350)            | 215                                      | 49.3                                   | 96 ± 3%<br>(50 mA cm <sup>-2</sup> ) | 0.1 M<br>H <sub>2</sub> SO <sub>4</sub> | This<br>work |
| FeCoNiIrRu                                    | 241                                      | 153                                    | –                                    | 0.5 M<br>H <sub>2</sub> SO <sub>4</sub> | 38           |
| Ni-RuO <sub>2</sub>                           | 214                                      | 42.6                                   | –                                    | 0.1 M<br>HClO <sub>4</sub>              | 40           |
| SrRuIrO                                       | 190                                      | 39                                     | –                                    | 0.5 M<br>H <sub>2</sub> SO <sub>4</sub> | 18           |
| Y <sub>2</sub> Ru <sub>2</sub> O <sub>7</sub> | 337                                      | 40                                     | 95–100%(1.5<br>6 V vs. RHE)          | 0.1 M<br>HClO <sub>4</sub>              | 26           |
| SnRuO <sub>x</sub>                            | 194                                      | 38.2                                   | –                                    | 0.1 M<br>H <sub>2</sub> SO <sub>4</sub> | 39           |
| IrO <sub>x</sub>                              | 340                                      | –                                      | 93%<br>(10 mA cm <sup>-2</sup> )     | 1 M<br>H <sub>2</sub> SO <sub>4</sub>   | 34           |
| commercial-<br>RuO <sub>2</sub>               | 370                                      | –                                      | –                                    | 0.5 M<br>H <sub>2</sub> SO <sub>4</sub> | 39           |
| amorphous-<br>RuO <sub>2</sub>                | 280                                      | –                                      | 92%<br>(10 mA cm <sup>-2</sup> )     | 1 M<br>H <sub>2</sub> SO <sub>4</sub>   | 34           |
